# Supplementary material for: Effects of Nutritional Interventions in Older Adults with Malnutrition or at Risk of Malnutrition on Muscle Strength and Mortality: Results of Pooled Analyses of Individual Participant Data from Nine RCTs
Source: MDPI journal article supplement (doi:10.3390/nu15092025), 2023-04-22
Supplement: s1 [file s1]

**Supplemental table S1. Characteristics of the included nutritional intervention RCTs**

| Study /Title                                                                                                                                                                    | Age   | Setting  | N participants<br>Control/<br>Intervention | Malnutrition inclusion<br>criteria                                                                                                                                                  | Intervention                                                                                                                                                                                                  | Duration | Reported<br>intervention<br>effect HGS              | Reported<br>intervention<br>effect<br>mortality | Reported<br>compliance                                                                                        |
|---------------------------------------------------------------------------------------------------------------------------------------------------------------------------------|-------|----------|--------------------------------------------|-------------------------------------------------------------------------------------------------------------------------------------------------------------------------------------|---------------------------------------------------------------------------------------------------------------------------------------------------------------------------------------------------------------|----------|-----------------------------------------------------|-------------------------------------------------|---------------------------------------------------------------------------------------------------------------|
| Beck 2013 Follow-up home visits with registered dietitians have a positive effect on the functional and nutritional status of geriatric medical patients after discharge: a RCT | > 65y | Hospital | 79/73                                      | BMI <20.5 kg/m <sup>2</sup> ; and/or weight loss within the last three months; and/or reduced dietary intake in the last week; and/or serious ill (Level 1 screening in NRS2002)    | Three individualized nutritional counselling visits by a dietitian complemented with three follow-up visits by general practitioners or three follow-up visits by general practitioners alone. ONS if needed. | 12 weeks | HGS improved, N (%) 27 (45)/31 (50) P= 0.844        | OR 0.60 (95% CI 0.17 to 2.13)                   | All three visits n (%)56 (97%).                                                                               |
| Beck 2015 Does adding a dietician to the liaison team after discharge of geriatric patients improve nutritional outcome: a RCT                                                  | > 70y | Hospital | 37/34                                      | WL >5% in 2 months; or BMI 18.5–20.5 kg/m <sup>2</sup> plus impaired general condition or food intake 25–60% of normal in past week or major disease (Level 2 screening in NRS2002) | Liaison-Team in cooperation with a dietician. The dietician performed 3 home visits, the first visit together with the discharge Liaison-Team, the remaining visits                                           | 12 weeks | Max kg, change median (95% CI) 0.5 / -0.4 P = 0.151 | OR 0.323 (95% CI 0.060; 1.724).                 | Of the 31 participants who completed the study, 30 (97%) received the planned remaining two dietician visits. |

performed by a  
dietician alone.  
ONS if needed.

|                                                                                                                                                        |       |                        |        |                                                         |                                                                                                                                                                                            |             |                                                                       |                                                                                        |                                                                       |
|--------------------------------------------------------------------------------------------------------------------------------------------------------|-------|------------------------|--------|---------------------------------------------------------|--------------------------------------------------------------------------------------------------------------------------------------------------------------------------------------------|-------------|-----------------------------------------------------------------------|----------------------------------------------------------------------------------------|-----------------------------------------------------------------------|
| Feldblum 2011<br>Individualized nutritional<br>intervention during and<br>after hospitalization: the<br>nutrition intervention<br>study clinical trial | > 65y | Hospital               | 181/78 | MNA-sf score < 10; or WL ≥<br>10% in previous 6 months. | Dietetic<br>treatment in<br>hospital; 3<br>home visits<br>after<br>discharge.                                                                                                              | 24<br>weeks | n.a.                                                                  | 3.8% had<br>died in<br>Group 1,<br>versus<br>11.6% in<br>Groups 2<br>and 3<br>(P=.046) | n.a.                                                                  |
| de Jong 2000 Dietary<br>supplements and physical<br>exercise affecting bone<br>and body composition in<br>frail elderly persons.                       | > 70y | community-<br>dwelling | 40/59  | BMI ≤25 kg/m <sup>2</sup> ; or recent<br>WL.            | 2X2 design: 1)<br>Enriched food<br>2) Exercise 3)<br>Both 4)<br>Neither. 2<br>products per<br>day: 1 from a<br>series of fruit<br>products and 1<br>from a series<br>of dairy<br>products. | 17<br>weeks | Not<br>mentioned<br>in the article<br>although it<br>was<br>measured. | n.a.                                                                                   | Not<br>mentioned in<br>the article<br>although it<br>was<br>measured. |

|                                                                                                                         |       |                   |         |                                                                                                                                                        |                                                                                                                                                                                        |          |                                                                                                            |                                                       |                                                                                                                                                                                  |
|-------------------------------------------------------------------------------------------------------------------------|-------|-------------------|---------|--------------------------------------------------------------------------------------------------------------------------------------------------------|----------------------------------------------------------------------------------------------------------------------------------------------------------------------------------------|----------|------------------------------------------------------------------------------------------------------------|-------------------------------------------------------|----------------------------------------------------------------------------------------------------------------------------------------------------------------------------------|
| Manders 2009 Effect of a nutrient-enriched drink on dietary intake and nutritional status in institutionalised elderly. | > 60y | Institutionalized | 57/119  | BMI $\leq$ 30 kg/m <sup>2</sup> .                                                                                                                      | 2 servings of 125ml of a complete nutrient-enriched dairy drink                                                                                                                        | 24 weeks | Not mentioned in the article although it was measured.                                                     | n.a.                                                  | In the group of participants who completed the full protocol, median compliance was 78% (range 19–94%) and 80% (range: 44–92%) for intervention and placebo group, respectively. |
| Neelemaat 2011 Post-Discharge nutritional support in malnourished elderly individuals improved functional limitation.   | > 60y | Hospital          | 105/105 | BMI $\leq$ 20 kg/m <sup>2</sup> ; and/or $\geq$ 5% unintentional WL in the previous month and/or $\geq$ 10% unintentional WL in the previous 6 months. | 2 servings of ONS, 6x Telephone counseling by dietitian. Energy and protein enriched diet (during the in-hospital period); Supplement of 400 IE vitamin D3 and 500 mg calcium per day. | 3 months | change in kilo mean ( $\pm$ SD) 0.2 (5.6) / 1.0 (6.7). Difference (95% confidence interval)–0.8 (–3.0–1.5) | Not mentioned in the article although it was measured | Adherence to oral nutritional support was 80%,                                                                                                                                   |

|                                                                                                                                                                    |            |                    |       |                                                                                                                                                                                                             |                                                                                                                                           |          |                                                                              |                                                                                                     |                                                                                                                                                |
|--------------------------------------------------------------------------------------------------------------------------------------------------------------------|------------|--------------------|-------|-------------------------------------------------------------------------------------------------------------------------------------------------------------------------------------------------------------|-------------------------------------------------------------------------------------------------------------------------------------------|----------|------------------------------------------------------------------------------|-----------------------------------------------------------------------------------------------------|------------------------------------------------------------------------------------------------------------------------------------------------|
| Schilp 2013 Effects of a dietetic treatment in older, undernourished, community-dwelling individuals in primary care: a RCT.                                       | > 65y      | Community-dwelling | 74/72 | MUAC <25 cm; and/or ≥4 kg unintentional WL within the past 6 months.                                                                                                                                        | Dietetic treatment, 1,000 mg calcium plus vitamin D 800 IU. ONS if needed.                                                                | 3 months | (b = 0.49 kg, 95 % CI: -0.62–1.60)                                           | Not mentioned in the article although it was measured.                                              | n.a.                                                                                                                                           |
| Stange 2013 Effect of a low-volume, nutrition- and energy-dense oral nutritional supplement on nutritional and functional status: a RCT in nursing home residents. | 87 +/- 6 y | institutionalized  | 42/45 | MNA score < 24 points; BMI ≤22 kg/m <sup>2</sup> ; a low food intake according to the nurses' perception; or WL ≥ 5% in the past 3 months or ≥10% or more in the past 6 months.                             | 2 servings of 125 ml ONS, Care personnel were instructed to encourage residents to consume the amount offered, and to support compliance. | 12 weeks | HGS, kPa T1 32 (25-43) 34 (20-42) control 40 (35-54) 43 (30-58) P = .407     | Three participants of the IG (6.7%) and 7 of the CG (16.7%) died during the study period (P= .144). | Median compliance of 72.9% (23.6%-86.6%)                                                                                                       |
| Tieland 2012 Protein supplementation improves physical performance in frail elderly people: a randomized, double-blind, placebo-controlled trial.                  | > 65y      | community-dwelling | 31/34 | Fried criteria: prefrail when 1 or 2 criteria were applicable, frail when ≥3 criteria. (1) unintentional WL; (2) weakness; (3) self-reported exhaustion; (4) slow walking speed; (5) low physical activity. | 2 servings, 250-mL containing 15 g protein.                                                                                               | 24 weeks | After 24 weeks, handgrip strength in both groups had not improved (P > .05). | n.a.                                                                                                | After 24 weeks of dietary intervention, at least 92% of the provided drinks were consumed in both the protein and placebo supplemented groups. |

Abbreviations: BMI = body mass index, MNA= mini nutritional assessment, MUAC = mid-upper arm circumference, ONS = oral nutritional support, WL= weight loss.
